# Supplementary material for: Large-scale selective preparation of porous SnO2 3D architectures and their gas-sensing property
Source: Royal Society of Chemistry journal article supplement (doi:10.1039/c2ce06738b), 2012-01-01
Supplement: c2ce06738b.pdf [file c2ce06738b.pdf]

Supplementary Material (ESI) for CrystEngComm  
This journal is (c) The Royal Society of Chemistry 2011

Electronic Supplementary Informations

**Large-scale selective preparation of porous SnO<sub>2</sub> 3D architectures and  
their gas-sensing property**

Jiarui Huang,<sup>\*a</sup> Xiaojuan Xu,<sup>a</sup> Cuiping Gu,<sup>\*a</sup> Siyuan Yao,<sup>a</sup> Yufeng Sun,<sup>\*b</sup> and Jinhuai  
Liu,<sup>c</sup>

<sup>a</sup>College of Chemistry and Materials Science, Anhui Normal University, Wuhu, 241000,  
P.R. China.

<sup>b</sup>Mechanical Engineering Department, Anhui Polytechnic University Wuhu, 241000, P.R.  
China.

<sup>c</sup>Research Center for Biomimetic Functional Materials and Sensing Devices, Institute of  
Intelligent Machines, Chinese Academy of Sciences, Hefei 230031, P.R. China.

Corresponding author. E-mail: jrhuang@mail.ahnu.edu.cn; cpgu2008@mail.ahnu.edu.cn;  
sunyufeng118@126.com.

Phone. +86-553-3869-303. Fax. +86-553-3869-303.

Supplementary Material (ESI) for CrystEngComm  
This journal is (c) The Royal Society of Chemistry 2011

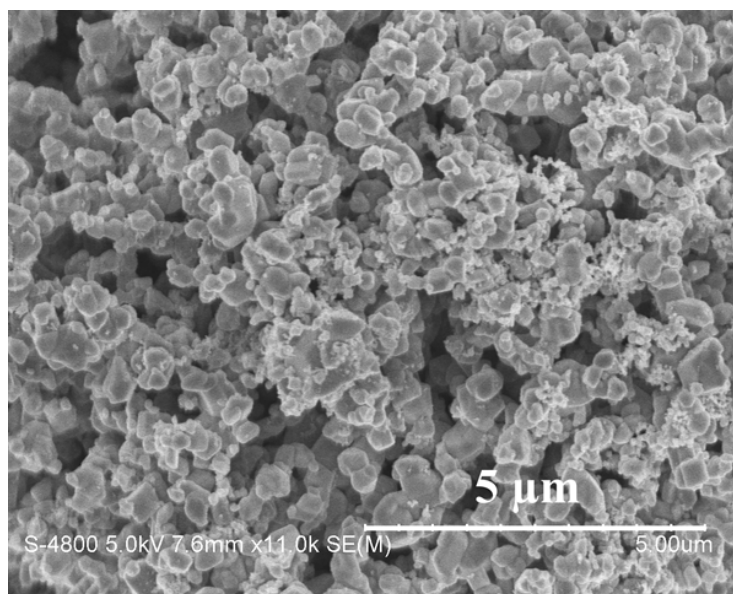

**Figure S1.** SEM image of the nonporous commercial SnO<sub>2</sub> powders.

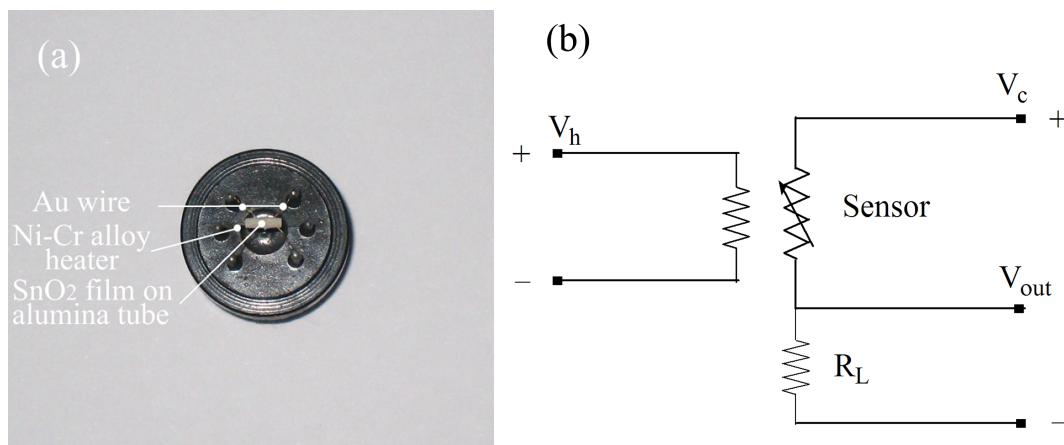

**Figure S2.** Photograph of the sensor (a), and test principle of the gas sensing measurement system (b) ( $V_h$ : heating voltage;  $V_c$ : circuit voltage;  $V_{out}$ : signal voltage and  $R_L$ : load resistor).

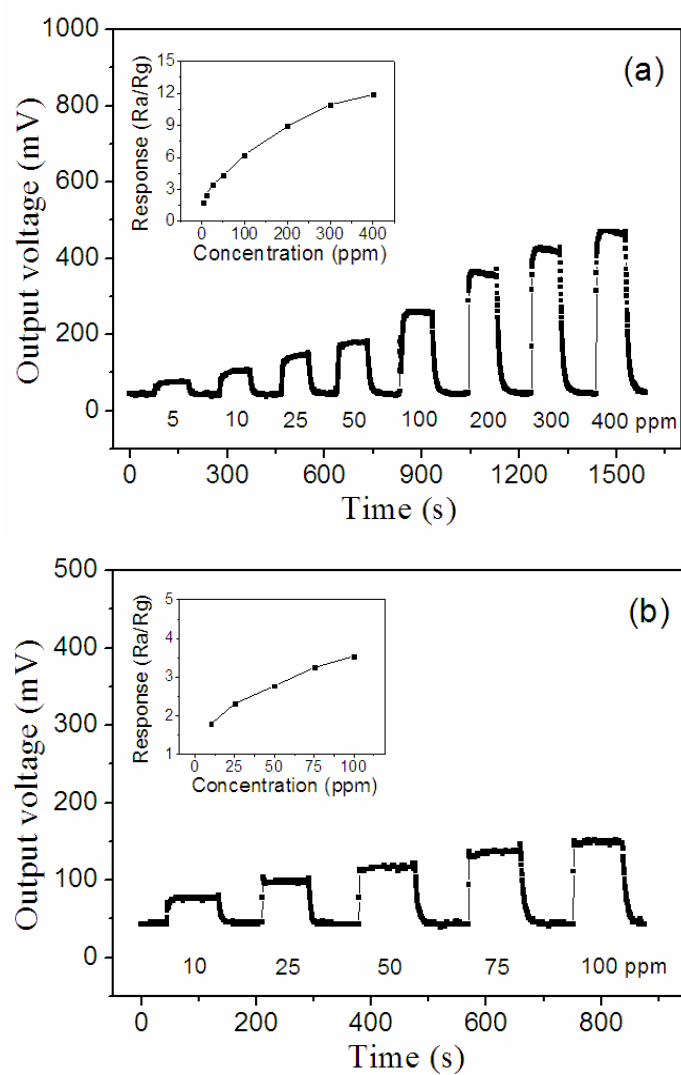

**Figure S3.** Real-time response curves and sensor responses (insert) of the commercial SnO<sub>2</sub> powder sensor upon exposure to different concentrations of toluene (a), formaldehyde (b) at a working temperature of 240 °C.

X-ray powder diffraction data of hexagonal mushistonite  $\text{CuSn}(\text{OH})_6$

| $2\theta$<br>CuK $\alpha$ $\lambda=1.5418\text{\AA}$ | $d$<br>( $\text{\AA}$ ) | $I/I_1$ | $hkl$ |
|------------------------------------------------------|-------------------------|---------|-------|
| 12.56                                                | 7.0428                  | 56      | 100   |
| 21.80                                                | 4.0731                  | 30      | 110   |
| 25.22                                                | 3.5285                  | 100     | 200   |
| 29.76                                                | 2.9999                  | 8       | 201   |
| 32.39                                                | 2.7621                  | 16      | 102   |
| 33.56                                                | 2.6682                  | 19      | 210   |
| 38.22                                                | 2.3532                  | 3       | 300   |
| 39.35                                                | 2.2877                  | 57      | 202   |
| 44.43                                                | 2.0375                  | 19      | 220   |
| 45.41                                                | 1.9954                  | 12      | 212   |
| 46.32                                                | 1.9585                  | 6       | 310   |
| 49.13                                                | 1.8528                  | 13      | 103   |
| 51.73                                                | 1.7657                  | 11      | 400   |
| 54.34                                                | 1.6868                  | 31      | 203   |
| 55.96                                                | 1.6417                  | 5       | 222   |
| 56.87                                                | 1.6176                  | 2       | 312   |
| 59.92                                                | 1.5425                  | 2       | 321   |
| 60.80                                                | 1.5221                  | 12      | 410   |
| 61.86                                                | 1.4986                  | 4       | 402   |
| 63.23                                                | 1.4694                  | 1       | 004   |
| 65.36                                                | 1.4266                  | 3       | 322   |
| 66.28                                                | 1.4090                  | 2       | 500   |
| 67.74                                                | 1.3822                  | 7       | 204   |
| 70.42                                                | 1.3360                  | 6       | 420   |
| 72.04                                                | 1.3098                  | 1       | 403   |
| 76.93                                                | 1.2383                  | 2       | 323   |
| 78.27                                                | 1.2204                  | 7       | 332   |
| 79.11                                                | 1.2096                  | 5       | 422   |

Molecular Weight: 284.28

Sys: Hexagonal

Cell parameters:  $a = b = 8.1431 \text{\AA}$ ,  $c = 6.0131 \text{\AA}$

Monochromators
